# Supplementary material
Source: PubMed Central journal article supplement (PMC7331009)
Supplement: rstb20190565supp1.pdf [file rstb20190565supp1.pdf]

## **Supplementary Material**

### **Helping decisions and kin recognition in long-tailed tits: is call similarity used to direct help towards kin?**

Amy E. Leedale<sup>1,2</sup>, Robert F. Lachlan<sup>3</sup>, Elva J. H. Robinson<sup>4</sup> & Ben J. Hatchwell<sup>2</sup>

<sup>1</sup>Department of Zoology, University of Cambridge, UK

<sup>2</sup>Department of Animal & plant Sciences, University of Sheffield, UK

<sup>3</sup>Department of Psychology, Royal Holloway University of London, UK

<sup>4</sup>Department of Biology, University of York, UK

*Philosophical Transactions of the Royal Society B: Biological Sciences*

Issue theme: Signal detection, acceptance thresholds, and the evolution of social recognition systems.

**Table S1.** Definitions of the acoustic parameters used to analyse long-tailed tit churr calls. Frequency parameters are the mean of multiple measurements taken at five time points across the signal.

| Call parameter                  | Definition                                                                           |
|---------------------------------|--------------------------------------------------------------------------------------|
| Duration (ms)                   | Total time between start and end of the call.                                        |
| Fundamental frequency (Hz)      | Frequency of pure-tone signals and common denominator frequency of harmonic signals. |
| Max. fundamental frequency (Hz) | Maximum fundamental frequency across the call.                                       |
| Weiner Entropy                  | Uniformity of the signal (noisiness).                                                |
| Bandwidth (Hz)                  | Frequency difference between the first and final maximum intensity of the signal.    |
| Number of repeats               | Number of element repetitions in second syllable                                     |

**Table S2.** Within-year repeatability, or effect of year calls were recorded, on variation in long-tailed tit churr call parameters ( $n = 907$  calls over 3 years).

| Call parameter                     | $R \pm SE$      | CI      | p    |
|------------------------------------|-----------------|---------|------|
| Duration (ms)                      | $0 \pm 0.07$    | 0, 0.06 | 1    |
| Number of repeats                  | $0.02 \pm 0.04$ | 0, 0.12 | 0.37 |
| Fundamental frequency (Hz)         | $0.04 \pm 0.05$ | 0, 0.16 | 0.39 |
| Maximum fundamental frequency (Hz) | $0.01 \pm 0.7$  | 0, 0.22 | 0.4  |
| Bandwidth (Hz)                     | $0.05 \pm 0.05$ | 0, 0.18 | 0.17 |
| Weiner Entropy                     | $0 \pm 0.01$    | 0, 0.04 | 1    |

**Table S3.** Sex differences in long-tailed tit churr call parameters, tested using Gaussian (continuous data) or Poisson (count data) GLMMs ( $n = 907$  calls over 3 years).

| Call parameter                     | Est.   | df    | t / z | p    |
|------------------------------------|--------|-------|-------|------|
| Log Duration (ms)                  | -0.03  | 48.91 | -0.92 | 0.36 |
| Number of repeats                  | -0.05  | -     | -0.99 | 0.32 |
| Fundamental frequency (Hz)         | -2.89  | 49.81 | -0.04 | 0.97 |
| Maximum fundamental frequency (Hz) | -36.26 | 51.10 | -0.47 | 0.64 |
| Bandwidth (Hz)                     | -64.28 | 50.95 | -1.65 | 0.11 |
| Weiner Entropy                     | 0.01   | 50.03 | 1.89  | 0.06 |

**Fig. S1.** Distributions of dissimilarity in long-tailed tit churr calls among (a) both sexes ( $n = 80$ ), (b) males ( $n = 46$ ), and (c) females ( $n = 34$ ) of three levels of kinship: first-order kin (purple bars,  $n = 71$  dyads), second-order kin (orange bars,  $n = 32$  dyads) and non-kin (green bars,  $n = 3057$  dyads), measured using dynamic-time warping analysis (DTW).

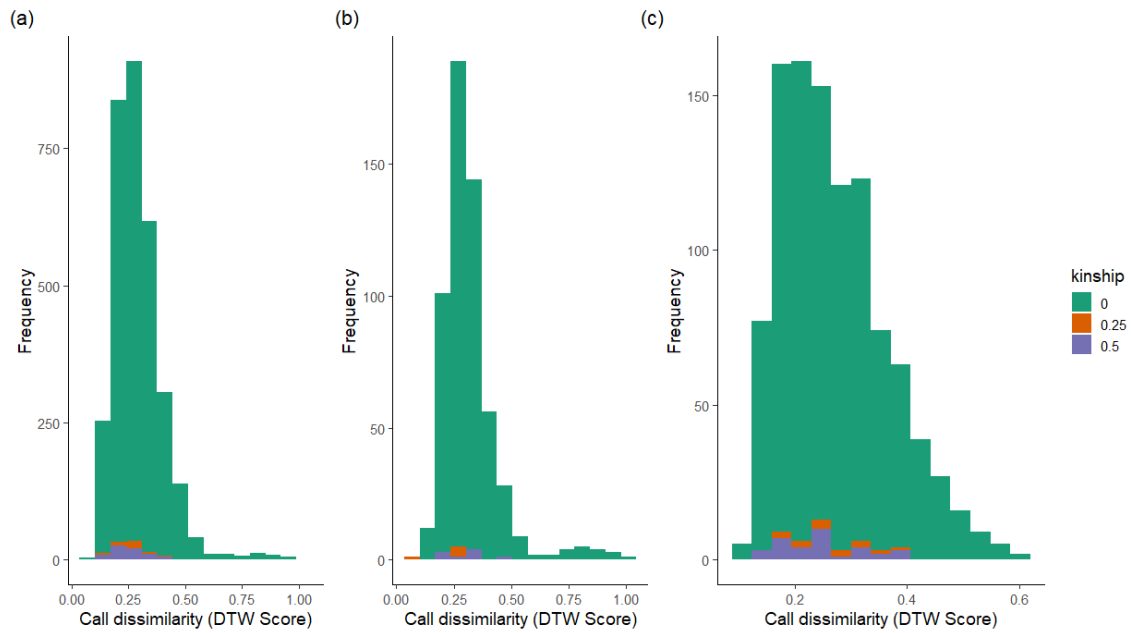

**Table S4.** GLMM outputs reporting the dissimilarity of long-tailed tit churr calls among helper-breeder dyads: (i) helpers and related ( $r \geq 0.25$ ) breeding males they helped ( $n = 9$ ); (ii) helpers and unrelated breeding males they helped ( $n = 8$ ) and (iii) helpers and unrelated breeding males within helping range ( $\leq 750\text{m}$ ) that they did not help ( $n = 218$ ). Call dissimilarity was measured using dynamic time warping analysis (DTW).

| <i>AIC</i>                                         | <i>residual df</i> | <i>N</i>             |          |          |
|----------------------------------------------------|--------------------|----------------------|----------|----------|
| -676                                               | 285                | 291                  |          |          |
| <i>Fixed effects</i>                               |                    | <i>Estimate ± SE</i> | <i>t</i> | <i>p</i> |
| <i>Reference: Helpers and helped relatives</i>     |                    |                      |          |          |
| (Intercept)                                        |                    | -1.57 ± 0.12         | -13.54   | <0.001   |
| Helpers and helped non-relatives                   |                    | -0.04 ± 0.14         | -0.29    | 0.77     |
| Helpers and unrelated breeders not helped          |                    | 0.20 ± 0.10          | 2.02     | 0.04     |
| <i>Reference: Helpers and helped non-relatives</i> |                    |                      |          |          |
| (Intercept)                                        |                    | -1.61 ± 0.11         | -14.54   | <0.001   |
| Helpers and unrelated breeders not helped          |                    | 0.24 ± 0.09          | 2.52     | 0.01     |
| <i>Random effects</i>                              |                    | <i>Variance ± SD</i> |          |          |
| Helper ( $N = 19$ )                                |                    | 0.02 ± 0.14          |          |          |
| Residual                                           |                    | 0.09 ± 0.31          |          |          |

**Table S5.** The relationship between the provisioning rate of long-tailed tit helpers ( $n = 41$  observation periods, 14 helpers, 11 nests) and the genetic relatedness, kinship and call dissimilarity of helpers to breeding males. Test statistics and significance terms are reported after backward step-wise removal of predictor variables. All biologically meaningful two-way interaction terms were also tested, and were included in the final model if they improved model fit ( $\Delta AIC > 2$ ).

| Model               | Predictor variable              | $\Delta AIC$ | $df$ | $\chi^2$ | $p$     |
|---------------------|---------------------------------|--------------|------|----------|---------|
| Genetic relatedness | Genetic relatedness             | 1.22         | 1, 6 | 0.77     | 0.38    |
|                     | Brood size                      | 0.94         | 1, 8 | 1.06     | 0.3     |
|                     | Group size                      | 2.44         | 1, 7 | 4.44     | 0.04    |
|                     | Nestling age                    | 2.57         | 1, 5 | 4.57     | 0.03    |
|                     | Genetic relatedness: group size | 3.94         | 1, 9 | 5.94     | 0.01    |
| Kinship             | Kinship                         | 3.69         | 1, 6 | 5.68     | 0.02    |
|                     | Brood size                      | 1.96         | 1, 8 | 0.03     | 0.85    |
|                     | Group size                      | 0.58         | 1, 7 | 2.59     | 0.11    |
|                     | Nestling age                    | 2.57         | 1, 5 | 4.57     | 0.03    |
|                     | Kinship: group size             | 9.61         | 1, 9 | 11.61    | < 0.001 |
| Call dissimilarity  | Call dissimilarity              | 1.99         | 1, 8 | 0.01     | 0.9     |
|                     | Brood size                      | 0.74         | 1, 7 | 1.26     | 0.26    |
|                     | Group size                      | 0.52         | 1, 6 | 2.52     | 0.11    |
|                     | Nestling age                    | 2.57         | 1, 5 | 4.57     | 0.03    |
